# Supplementary material for: MXene/NiO Composites for Chemiresistive-Type Room Temperature Formaldehyde Sensor
Source: MDPI journal article supplement (doi:10.3390/chemosensors11040258), 2023-04-21
Supplement: s1 [file s1]

Supplementary

# MXene/NiO Composites for Chemiresistive-Type Room Temperature Formaldehyde Sensor

Baoyu Huang <sup>1</sup>, Xinwei Tong <sup>1</sup>, Xiangpeng Zhang <sup>2</sup>, Qiuxia Feng <sup>3</sup>, Marina N. Rumyantseva <sup>4</sup>, Jai Prakash <sup>5</sup> and Xiaogan Li <sup>1,\*</sup>

<sup>1</sup> School of Microelectronics, Dalian University of Technology, Dalian 116024, China; huangby@dlut.edu.cn (B.H.);

<sup>2</sup> AVIC Jonhon Optron Technology Co., Ltd., Luoyang 471003, China

<sup>3</sup> School of Information and Control Engineering, Qingdao University of Technology, Qingdao 266520, China

<sup>4</sup> Laboratory of Chemistry and Physics of Semiconductor and Sensor Materials, Chemistry Department, Moscow State University, Leninskie Gory 1-3, 199991 Moscow, Russia

<sup>5</sup> Department of Chemistry, National Institute of Technology (NIT), Hamirpur 177005, India

\* Correspondence: lixg@dlut.edu.cn

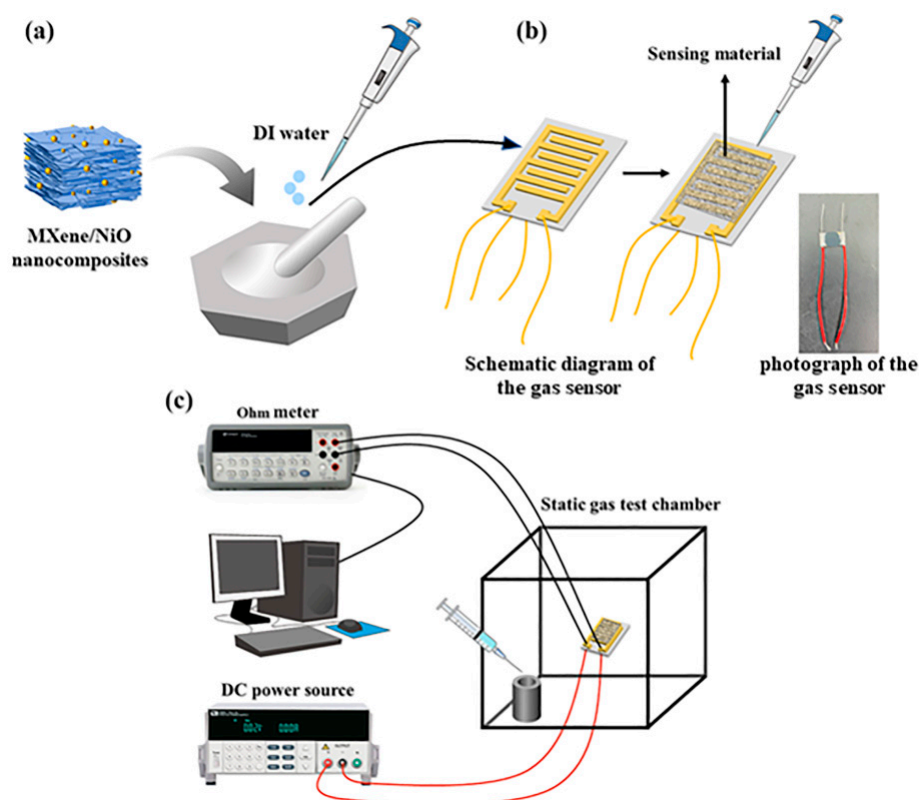

**Figure S1.** (a) Schematic illustration of the synthesis process of the sensing material (b) Schematic diagram and photograph of the gas sensor. (c) Schematic diagram of the static testing system.

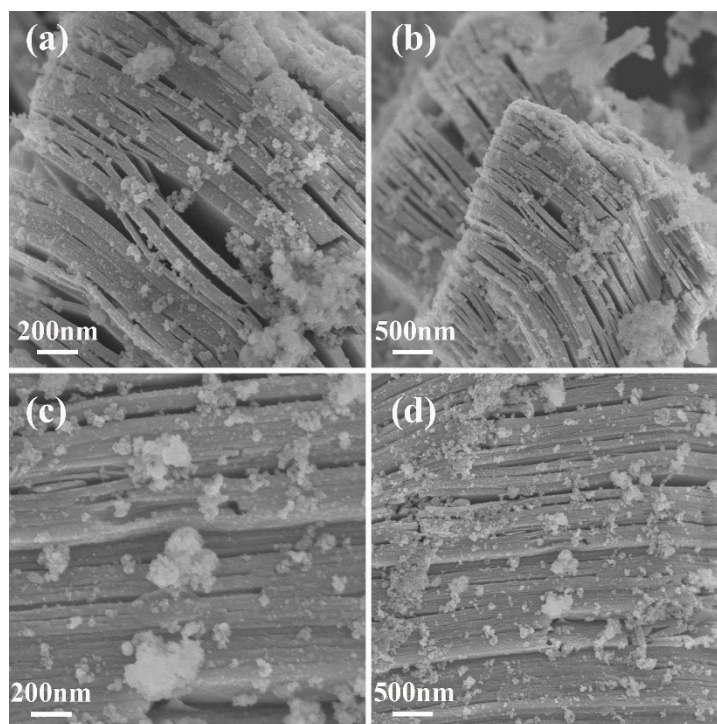

**Figure S2.** SEM images of (a,b) MXene/NiO-P1 and (c,d)MXene/NiO-P3.

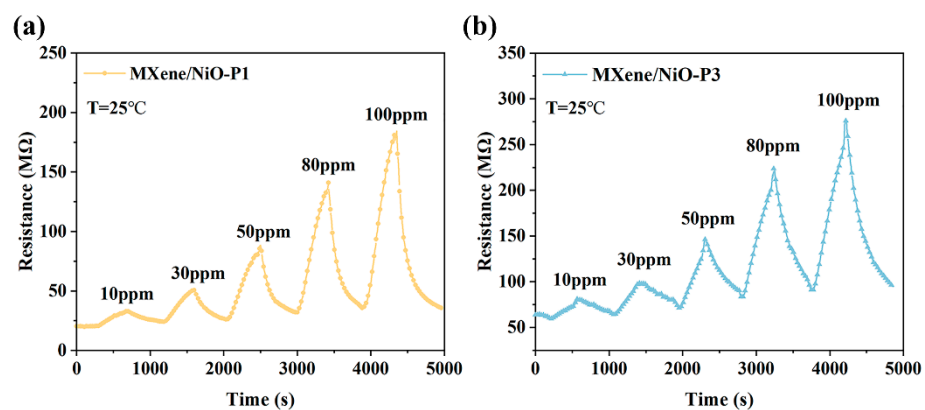

**Figure S3.** Real-time resistance changes of the sensors based on (a) MXene/NiO-P1 and (b) MXene/NiO-P3 to 10–100 ppm HCHO at 25 °C and RH=40%.

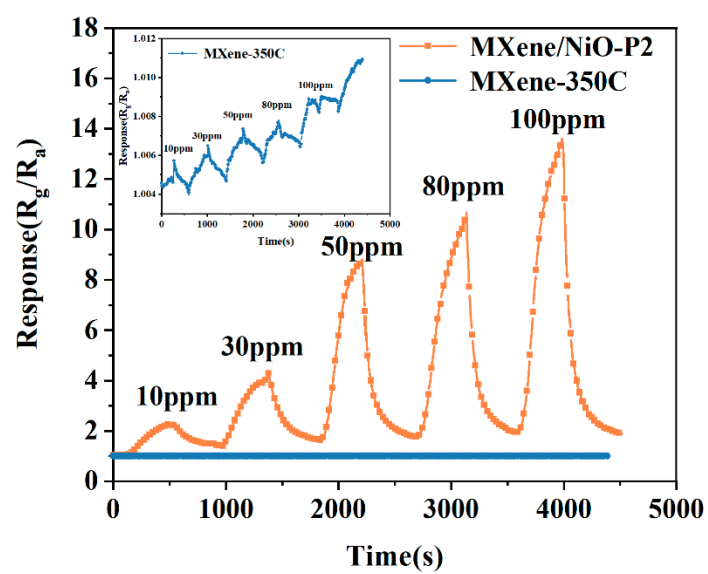

**Figure S4.** Response changes of the sensors based on MXene/NiO-P2 and MXene-350C to 10–100 ppm HCHO at 25 °C and RH=40%.
